# Supplementary material
Source: Research Square preprint supplement (doi:10.21203/rs.3.rs-9545672/v1)
Supplement: Supplementary file 1 [file dbaa27d494385685bfb1f8c5.pdf]

| BIBLIOGRAPHIC REFERENCES                                                                                                                                                                                                                                                                               | TERRITORY OF ANALYSIS      | OBJECTIVE                                                                                                                                                                                                                                       | TYPE OF AGROECOSYSTEM                                                                                                                                                                                                                   | METHODOLOGICAL APPROACHES           | TECHNIQUES AND TOOLS                                                                                                                                                                                                                                                                                                 | DIMENSIONS ADDRESSED                                        | FARMERS' PERCEPTION                                                                                                                                                                                    | RESILIENCE / ADAPTATION                                                              |
|--------------------------------------------------------------------------------------------------------------------------------------------------------------------------------------------------------------------------------------------------------------------------------------------------------|----------------------------|-------------------------------------------------------------------------------------------------------------------------------------------------------------------------------------------------------------------------------------------------|-----------------------------------------------------------------------------------------------------------------------------------------------------------------------------------------------------------------------------------------|-------------------------------------|----------------------------------------------------------------------------------------------------------------------------------------------------------------------------------------------------------------------------------------------------------------------------------------------------------------------|-------------------------------------------------------------|--------------------------------------------------------------------------------------------------------------------------------------------------------------------------------------------------------|--------------------------------------------------------------------------------------|
| Title: Perception of and adjustment to adverse weather events among smallholder coffee farmers in Rwanda<br>Authors: ohanna Gather · Meike Wollni - Publication date: July 19, 2023                                                                                                                    | Rwanda                     | This study was conducted with smallholder coffee farmers in Rwanda, focusing on their perceptions of adverse weather events and their adaptive responses.                                                                                       | Diversity of agroecological cropping systems (coffee farmers)<br><i>(Agroecological)</i>                                                                                                                                                | Mixed; Qualitative and Quantitative | Initial contact was made with coffee farmer group leaders, followed by household interviews with the farmers. The research questionnaire collected information on family demographics, coffee production and marketing, production of different coffee crops, use of inputs at the plot level, and certification. It | Social, Cultural, Economic, and Environmental               | Short or delayed rainy season and long periods of drought                                                                                                                                              | Income diversification through the cultivation of other crops and trees for shading. |
| Title: Factors associated with smallholders' uptake of intercropping in Southeast Asia: A cross-country analysis of Vietnam, Laos, and Cambodia / Authors: Thanh Mai Ha, Pisidh Voe, , Sayvisene Boulom, Thi Thanh Empréstimo Le, Curvo Duan Dao, Fu Yang d, Xuan Phi Dang. - Publication date: August | Vietnam, Laos and Cambodia | This study aimed to investigate the association between a range of psychological drivers and the adoption of intercropping among smallholder farmers. These include perceptions of (1) social support, (2) climate change severity, (3) climate | Various consortia—maize and legumes such as soybean, red peanut, and small peas—and fruit trees or intercrops between fruit trees, coffee, and cereals; pumpkin and loofah are often intercropped with rice and maize <i>(hybrid)</i> . | Mixed; Qualitative and Quantitative | Household questionnaires covering sociodemographic characteristics and intercropping practices. The results suggest that farmers' adoption of climate adaptation and mitigation measures is linked to perception, information, and knowledge.                                                                        | Social, Cultural, Agricultural, Environmental, and Economic | Not expressed in discourse, only in comparative results. (The perceived impact of climate change was also significantly associated with the tendency to adopt intercropping in all countries studied.) | Use of intercropping as a mechanism for resilience in production systems.            |
| Title: Unraveling farmers' interrelated adaptation and mitigation adoption decisions under perceived climate change risks. / Authors: María Rodríguez-Barillas, Marijn Poortvliet, Laurens Klerkx - Publication date: June, 25, 2024.                                                                  | Costa Rica                 | This study aims to identify key risk-related factors that influence multiple adaptation and mitigation strategies through the adoption of Climate-Smart Agriculture (CSA) technologies to reduce vulnerability to climate change. It            | Coffee farming with possible climate adaptation methods <i>(hybrid)</i>                                                                                                                                                                 | Mixed; Qualitative and Quantitative | Focus group; sociodemographic questionnaire, and data collection application (Qualtrics software)                                                                                                                                                                                                                    | Social, Cultural, Economic, and Environmental               | Not expressed in discourse or reports, only in comparative results. Practices used as mitigation or adaptation to climate change.                                                                      | Adopted strategies: soil conservation, planting of legumes, reduction of inputs.     |
| Title: Using local knowledge to reconstruct climate-mediated changes in disease dynamics and yield—A case study on Arabica coffee in its native range. / Authors: Gather e Wollni - Publication date: February, 20, 2024.                                                                              | Gomma and Gera (Ethiopia)  | To understand the relationships between climate change, disease dynamics, and coffee production in one of the centers of indigenous diversity of Arabica coffee in southwestern Ethiopia, by exploring past changes                             | Family and commercial coffee farming (minimal management in natural forest to moderate management on small rural properties and intensive management in commercial coffee plantations)<br><i>(traditional)</i>                          | Mixed; Qualitative and Quantitative | Interviews with farmers and commercial plantation managers, and statistical analysis (R)                                                                                                                                                                                                                             | Social and Environmental                                    | Changes in the incidence of pests and diseases over the years due to prolonged dry seasons and increased temperatures.                                                                                 | Not reported                                                                         |

| BIBLIOGRAPHIC REFERENCES                                                                                                                                                                                                                                                        | TERRITORY OF ANALYSIS     | OBJECTIVE                                                                                                                                                                                                                             | TYPE OF AGROECOSYSTEM                                                                              | METHODOLOGICAL APPROACHES           | TECHNIQUES AND TOOLS                                                                                                                                                                                         | DIMENSIO S ADDRESSED                                       | FARMERS' PERCEPTION                                                                                                                                                                                                                                                                                                                 | RESILIENCE / ADAPTATION                                                                                                                                                                                                                                                   |
|---------------------------------------------------------------------------------------------------------------------------------------------------------------------------------------------------------------------------------------------------------------------------------|---------------------------|---------------------------------------------------------------------------------------------------------------------------------------------------------------------------------------------------------------------------------------|----------------------------------------------------------------------------------------------------|-------------------------------------|--------------------------------------------------------------------------------------------------------------------------------------------------------------------------------------------------------------|------------------------------------------------------------|-------------------------------------------------------------------------------------------------------------------------------------------------------------------------------------------------------------------------------------------------------------------------------------------------------------------------------------|---------------------------------------------------------------------------------------------------------------------------------------------------------------------------------------------------------------------------------------------------------------------------|
| Title: Perceptions of Deficiencies in the Basic Conditions for Farm Management and Quality of Life in Coffee-Growing Households: A Panel Analysis of a Rural Community in Households: A Panel Analysis of a Rural Community / Authors: Anna Lina Bartl - Publication date: 2024 | Uganda                    | This article identifies categories and levels of deficiencies in coffee farming conditions and in the quality of life of coffee-growing households. It is based on quantitative and qualitative responses from 360 smallholder coffee | Small coffee plots (hybrid)                                                                        | Mixed; Qualitative and Quantitative | Quantitative: (exploratory principal component analysis to select indicators)<br>Qualitative: (questionnaires on how climate change and other externally influenced conditions impact perceived constraints) | Social, Cultural, Economic, Environmental, Vulnerabilities | Does not present any discourse; it highlights some aspects such as access to water, technical assistance, market reliability, and access to resources and technologies.                                                                                                                                                             | Not reported                                                                                                                                                                                                                                                              |
| Title: From climate perceptions to actions: A case study on coffee farms in Ethiopia / Authors: Xènia Gomm, Biruk Ayalew, Kristoffer Hylander, Francesco Zignol, Lowe Börjeson, Ayco JM Tack - Publication date: February, 25, 2024.                                            | Gomma and Gera (Ethiopia) | The main objective of this study was to examine the relationship between climate change, farmers' perceptions of climate change, and management adaptation. To this end, 56 coffee farmers were interviewed and                       | Coffee is grown within natural forest, smaller forest fragments, and forest edges (agroecological) | Mixed; Qualitative and Quantitative | Interviews, analysis of secondary climate data, and statistical analyses (statistical tests including the Mann–Kendall trend test)                                                                           | Social and Environmental                                   | Temperatures, duration of dry spells                                                                                                                                                                                                                                                                                                | Farmers in warmer temperatures more frequently apply organic matter and implement soil and water conservation practices, while farmers in cooler areas more often diversify their crops, manage shade levels, and improve coffee varieties. (Not reported but evidenced). |
| Title: Co-designing a research agenda for climate adaptation in El Salvador's coffee sector: A transdisciplinary perspective / Authors: Jose Daniel Teodoro, Suzanne Marselis, Antonella Maiello, Achim Hager - Publication date: January, 30, 2024.                            | El Salvador               | To (i) generate collective awareness of experiences related to climate impacts and (ii) outline a research agenda that can facilitate successful climate change adaptation strategies.                                                | Coffee farming (hybrids)                                                                           | Mixed; Qualitative and Quantitative | Secondary data (documentary), in-depth informal conversations, questionnaires, field visits, small group discussions, and a workshop. Statistical data (mean and standard deviation).                        | Social and Environmental                                   | The climate in El Salvador has changed noticeably in recent decades, and more intense climatic events have been experienced in recent years. Most survey respondents are aware of the risks of climate change for the coffee sector and the need for adaptation.                                                                    | Diversification of agricultural crops is essential to increase resilience to climate change.                                                                                                                                                                              |
| Title: Are Vietnamese coffee farmers willing to pay for weather index insurance? / Authors: Le Lan, Shahbaz Mushtaq, Qingxia (Jenny) Wang, Angelica Barlis, Aline Deniau, Vivekananda Mittahalli Byrareddy, Huynh Tan Anh, Kees Swaans - Publication date: December, 12, 2023.  | Vietnam                   | The main objective of this phase is to explore market demand and raise awareness of Weather Index Insurance (WII), introducing its concept and how it works through a pilot phase for the local community. This study was             | Coffee farming (conventional).                                                                     | Quantitative                        | Questionnaires (statistical description)                                                                                                                                                                     | Social, Economic, Environmental, and Agricultural          | The impacts of drought on yield and income loss were perceived as the highest among all extreme climatic events. Drought was experienced by the majority of the surveyed farmers (91%), followed by excessive rainfall (23%), high temperatures (13.9%), and strong winds (6%). Respondents reported that drought led to an average | Unreported strategies; only an indication of the use of insurance as a damage reduction strategy.                                                                                                                                                                         |

| BIBLIOGRAPHIC REFERENCES                                                                                                                                                                                                                                                                                                               | TERRITORY OF ANALYSIS | OBJECTIVE                                                                                                                                                                                                                        | TYPE OF AGROECOSYSTEM                                                                                                                                                                          | METHODOLOGICAL APPROACHES           | TECHNIQUES AND TOOLS                                                                                                                  | DIMENSIO S ADDRESSED                                           | FARMERS' PERCEPTION                                                                                                                                               | RESILIENCE / ADAPTATION                                                                                                                                                                                                                  |
|----------------------------------------------------------------------------------------------------------------------------------------------------------------------------------------------------------------------------------------------------------------------------------------------------------------------------------------|-----------------------|----------------------------------------------------------------------------------------------------------------------------------------------------------------------------------------------------------------------------------|------------------------------------------------------------------------------------------------------------------------------------------------------------------------------------------------|-------------------------------------|---------------------------------------------------------------------------------------------------------------------------------------|----------------------------------------------------------------|-------------------------------------------------------------------------------------------------------------------------------------------------------------------|------------------------------------------------------------------------------------------------------------------------------------------------------------------------------------------------------------------------------------------|
| Title: What determines the acceptance of Climate Smart Technologies? The influence of farmers' behavioral drivers in connection with the policy environment. / Authors: María Rodríguez-Barillas, Laurens Klerkx, P. Marijn Poortvliet - Publication date: November, 16, 2023.                                                         | Costa Rica            | This article proposes a model that integrates behavioral drivers and policy mix evaluation influencing the acceptance of Climate-Smart Agriculture (CSA) technologies. The objective is to examine how farmers' behavioral       | Coffee farming (?)                                                                                                                                                                             | Mixed; Qualitative and Quantitative | Focus group, recording, interview transcription, statistical analyses (R, independent and dependent variables)                        | Economic and Environmental                                     | Not reported                                                                                                                                                      | Not reported                                                                                                                                                                                                                             |
| Title: Small-scale coffee farmers' perception of climate-adapted attributes in participatory coffee breeding: A case study of Gayo Highland, Aceh, Indonesia. / Authors: Abdul Muis Hasibuan , Enny Randriani , Dani Dani , Tri Joko Santoso , Apri Laila Sayekti , Nur Khoilatul Izzah , Budi Martono , Mawarti Sari Dewi Ibrahim     | Indonesia             | This study aims to assess farmers' perceptions of the importance of climate-related attributes of local coffee varieties developed through a participatory breeding program in Gayo Highland, Aceh, Indonesia. Using survey data | Three altitude categories, namely 900, 1,300, and 1,500 meters above sea level, in order to capture variation in coffee growth and yield performance across different altitudes (traditional). | Mixed; Qualitative and Quantitative | Interviews collecting demographic data and perceptions, analyzed using the Fishbein method                                            | Social, Economic, Environmental, and Cultural                  | Importance of the attributes assigned to the varieties: early harvest maturity, productivity, coffee bean size, resistance to the coffee berry borer, and flavor. | Cultivation of species resistant to pests, diseases, and drought, with greater adaptability to drought, intense rainfall, and prolonged rainy periods, as well as productivity and bean size.                                            |
| Title: An appraisal on the determinants of adaptation responses to the impacts of climate variability on coffee Production: Implication to household food security in Nensebo Woreda, Ethiopia / Authors: Desalegn Yayeh Ayal a, Ansha Nure, Bechaye Tesfaye, Kassahun Ture, Tadesse Terefe Zeleke. - Publication date: April 24, 2022 | Ethiopia              | To examine the determinants of adaptation responses to climate variability in coffee production and their implications for household food security in Nensebo Woreda, Ethiopia.                                                  | Coffee farming in agroecological zones (agroecological)                                                                                                                                        | Mixed; Qualitative and Quantitative | Interviews, focus groups, thematic content analysis, descriptive statistics, and econometric analysis methods                         | Social, Economic, Cultural, and Environmental, Food Insecurity | Temperatures and droughts                                                                                                                                         | Improved coffee varieties, irrigation, soil conservation, crop diversification, agroforestry practices, weather information, and shade management.                                                                                       |
| Title: Smallholder coffee-based farmers' perception and their adaptation strategies of climate change and variability in South-Eastern Ethiopia. / Authors: Tariku Olana Jawo, Nikola Teutscheroová, Mesele Negash, Kefyalew Sahle, Bohdan Lojka. - Publication date: January, 08, 2023.                                               | Sidama, Ethiopia      | (i) To assess perceptions of climate change and their relationship with adaptation strategies adopted by smallholder coffee farmers along elevation gradients in the Sidama Regional State, Ethiopia, one of the country's main  | Smallholder coffee agroecosystems (agroecological)                                                                                                                                             | Mixed; Qualitative and Quantitative | Interview, focus group, field observation, statistics (Severity Index, Mann-Kendall test, and Weighted Mean), and meteorological data | Social, Economic, and Environmental                            | Temperature and precipitation, changes in coffee production such as fruit quality, maturation, and increased incidence of pests and diseases.                     | The adoption of agroforestry systems/tree planting, application of organic fertilizer/compost, soil conservation, modification of the agricultural calendar, crop diversification, among other strategies that appeared less frequently. |

| BIBLIOGRAPHIC REFERENCES                                                                                                                                                                                                                                                           | TERRITORY OF ANALYSIS | OBJECTIVE                                                                                                                                                                                                                                 | TYPE OF AGROECOSYSTEM                                    | METHODOLOGICAL APPROACHES           | TECHNIQUES AND TOOLS                                                                                                                                                                  | DIMENSIOES ADDRESSED                                                                                                                                                      | FARMERS' PERCEPTION                                                                                                                                                                                                                                                                                                | RESILIENCE / ADAPTATION                                                                                                                                                                                                                                                                                                                                                                                |
|------------------------------------------------------------------------------------------------------------------------------------------------------------------------------------------------------------------------------------------------------------------------------------|-----------------------|-------------------------------------------------------------------------------------------------------------------------------------------------------------------------------------------------------------------------------------------|----------------------------------------------------------|-------------------------------------|---------------------------------------------------------------------------------------------------------------------------------------------------------------------------------------|---------------------------------------------------------------------------------------------------------------------------------------------------------------------------|--------------------------------------------------------------------------------------------------------------------------------------------------------------------------------------------------------------------------------------------------------------------------------------------------------------------|--------------------------------------------------------------------------------------------------------------------------------------------------------------------------------------------------------------------------------------------------------------------------------------------------------------------------------------------------------------------------------------------------------|
| Title: Farming adaptation strategies against climate variability. Coffee case, municipality of Huehuetla, State of Puebla, Mexico. / Authors: Claudia Gonzalez, José Pedro Juárez Sánchez, Benito Ramirez Valverde, Jose Arturo Mendez Espinoza. - Publication date: January, 2023 | Mexico                | To analyze the adaptation strategies adopted by smallholder coffee farmers in response to climate change.                                                                                                                                 | Smallholder coffee agroecosystems (hybrid)               | Mixed; Qualitative and Quantitative | Interviews using questionnaires with mostly closed-ended questions, and application of non-parametric Chi-square ( $\chi^2$ ) and parametric Student's t-test.                        | Social, Economic, Environmental, and Management                                                                                                                           | Temperature related to reduced production, leaf scorching, poor fruit formation, and uneven ripening; extreme events; rainfall impacted them through landslides.                                                                                                                                                   | Reduction or modification of the agricultural work routine, especially weed control, phytosanitary management, and weeding. In the case of phytosanitary control, one of the strategies used by producers is the use of improved varieties. They are also developing agricultural strategies, such as planting other crops to obtain additional income and food, and the use of shade trees, which are |
| Title: Percepción de los efectos del cambio climático y prácticas de adaptación de los caficultores del Estado de Puebla, México. / Authors: Hernández-Castán, Tapia-Hervert Calderón. - Publication date: March, 02, 2023.                                                        | Puebla / Mexico       | The study aimed to generate information for different coffee-producing regions in the state of Puebla, regarding farmers' characteristics, experienced climate impacts, their perceptions of these impacts, and the adaptation practices. | Smallholder coffee agroecosystems (hybrid)               | Mixed; Qualitative and Quantitative | Semi-structured interviews, descriptive statistics, categorization, and force field analysis to identify strategies                                                                   | Social, Economic, Environmental, and Agricultural                                                                                                                         | Drought, landslides, delayed rainfall, frost, and fires                                                                                                                                                                                                                                                            | Mowing and clearing, terrace formation, contour farming, and the use of materials such as wood for containment.                                                                                                                                                                                                                                                                                        |
| Title: Smallholder coffee producer's perception to climate change and variability: the evidence from Mana district, South Western Ethiopia. / Authors: Alemu Tesfaye. - Publication date: November, 05, 2021.                                                                      | Ethiopia              | The objective is to explore and address existing research gaps regarding smallholder coffee farmers' perceptions of climate change and the socioeconomic factors influencing them in the study area.                                      | Zone of different coffee agroecosystems (agroecological) | Mixed; Qualitative and Quantitative | Interviews, focus groups, secondary data (articles and technical notes), and statistical data (statistics such as mean, variance, minimum and maximum, and percentage and frequency). | Social, Economic, Environmental, and Agricultural                                                                                                                         | 52.2% of households agreed that precipitation has decreased, while 26.3% disagreed and 21.5% were neutral regarding the decrease in rainfall. A total of 54.5% agreed that temperatures have increased. About 49.1% of households disagreed that there has been no change in temperature, while 22.0% and 18.9% of | Not reported                                                                                                                                                                                                                                                                                                                                                                                           |
| Title: Percepción y adaptación de productores de café al cambio climático en Puebla y Oaxaca, México. / Authors: José Luis Jaramillo-Villanueva1, Jesús Guerrero-Carrera, Samuel Vargas-López, Ángel Bustamante-González. - Publication date: February, 27, 2022.                  | Puebla, Mexico        | The objective of this study was to analyze the factors explaining coffee farmers' perceptions of and adaptation to climate change in the Mazateca region of Oaxaca and Cuetzalan, Puebla.                                                 | Smallholder coffee agroecosystems (conventional)         | Mixed; Qualitative and Quantitative | Individual interviews, regression model                                                                                                                                               | Sociodemographic characteristics, producer characteristics, coffee production process, costs and revenues, associations, and perception and adaptation to climate change. | Increase in pests and diseases, excessive precipitation, reduced production, irregular rainfall, and strong winds                                                                                                                                                                                                  | Change in coffee varieties to those more resistant to temperature and to the incidence of certain pests and diseases                                                                                                                                                                                                                                                                                   |

| BIBLIOGRAPHIC REFERENCES                                                                                                                                                                                                                                                                  | TERRITORY OF ANALYSIS | OBJECTIVE                                                                                                                                                                                                                                    | TYPE OF AGROECOSYSTEM                                     | METHODOLOGICAL APPROACHES           | TECHNIQUES AND TOOLS                                                                                                                          | DIMENSIO S ADDRESSED                                                                                                                                                                          | FARMERS' PERCEPTION                                                                                                                                                        | RESILIENCE / ADAPTATION                                                                                                                                                                                                                                                                                                                                                                                               |
|-------------------------------------------------------------------------------------------------------------------------------------------------------------------------------------------------------------------------------------------------------------------------------------------|-----------------------|----------------------------------------------------------------------------------------------------------------------------------------------------------------------------------------------------------------------------------------------|-----------------------------------------------------------|-------------------------------------|-----------------------------------------------------------------------------------------------------------------------------------------------|-----------------------------------------------------------------------------------------------------------------------------------------------------------------------------------------------|----------------------------------------------------------------------------------------------------------------------------------------------------------------------------|-----------------------------------------------------------------------------------------------------------------------------------------------------------------------------------------------------------------------------------------------------------------------------------------------------------------------------------------------------------------------------------------------------------------------|
| Title: A Coffee Yield Next-Generation Forecast System for Rain-Fed Plantations: The Case of the Samala Watershed in Guatemala. / Authors: DIEGO PONS, ÁNGEL G. MUÑOZ, LÍGIA M. MELENDEZ, E CARMEM GONZALEZ ROMERO MARIO HOCOOJ, XANDRE COURIO, ROSÁRIO GÓMEZ. - Publication date: October | Samalá, Guatemala     | In this study, we developed a model based on the initial identification of the most relevant climatic variable for farmers in the region. The model was then cross-validated using statistical methods, and its output was evaluated against | Agroecosystems in volcanic regions ( <b>hybrid</b> )      | Mixed; Qualitative and Quantitative | Field notebook, conversations and notes from requested information, questionnaires, and descriptive statistics.                               | Cultural, Agricultural, and Environmental                                                                                                                                                     | Changes in regional precipitation and its influence on coffee productivity, changes in temperature                                                                         | Coffee farmers manage risks associated with soil erosion, landslides, subsidence, and damage to roads and infrastructure, as indicated by technical advisors in the region. (No reports of concrete experiences with strategies)                                                                                                                                                                                      |
| Title: Climate change risk perception and adaptive behavior of coffee farmers: the mediating role of climate-related attitudinal factors and moderating role of self-efficacy. / Authors: Tuyen Thi Tran-Hong Chen. - Publication date : November, 16, 2021.                              | Honduras              | The objective of this study is to identify the impact of climate change risk perception (CCRP) on the adaptive behavior of coffee farmers in Honduras.                                                                                       | Small smallholder coffee agroecosystems ( <b>hybrid</b> ) | Mixed; Qualitative and Quantitative | Questionnaires based on purposive sampling and coefficients                                                                                   | Social and Agricultural                                                                                                                                                                       | Concern or lack of concern about climate change                                                                                                                            | Not reported                                                                                                                                                                                                                                                                                                                                                                                                          |
| Title: Leveraging communities' network strengths to support climate change adaptation information-sharing: a study with coffee farmers in Risaralda, Colombia. / Authors: Jessica Eise, Natalie J Lambert, Eric C. Wiemer. - Publication date: October, 01, 2021.                         | Colombia              | In this study, we measured farmers' information-sharing ego networks and their information-related attributes through first-person interviews, in collaboration with local experts experienced in engaging with coffee farmers in the        | Coffee agroecosystems (?)                                 | Qualitative                         | Semi-structured interviews                                                                                                                    | Demographics, ego networks on climate change, and information networks                                                                                                                        | Access to information, climate bulletins, TV, telephone, and text messages                                                                                                 | Not reported                                                                                                                                                                                                                                                                                                                                                                                                          |
| Title: Climate Change Perceptions by Smallholder Coffee Farmers in the Northern and Southern Highlands of Tanzania. / Authors: Suzana G. Mbwambo, Sixbert K. Maurice, e Akwilin JP Tarimo. - Publication date: June, 2, 2021.                                                             | Tanzania              | The objective of this study was to assess coffee farmers' perceptions of climate change, taking into account their demographic, physical, and cultural differences.                                                                          | Diverse coffee agroecosystems ( <b>agroecological</b> )   | Mixed; Qualitative and Quantitative | Semi-structured questionnaires, secondary climate data (precipitation and temperature), and descriptive statistical analyses, Chi-square test | Demographic variables, agricultural systems, farmers' perception of climate change, climate change awareness, and external factors such as extension services and meteorological information. | Increase in temperature and decrease in precipitation, prolonged harvest period, delayed flowering, reduced yield, crop failure, increased incidence of pests and diseases | Soil and water conservation practices included the use of terraces, cut-off drains, and mulching, as well as the application of mulch in plantations. Farmers also began planting coffee varieties tolerant to diseases such as rust; however, most farmers who perceive these changes still cultivate older coffee varieties. Farming households that perceived climate change used organic fertilizers. (Shade tree |

| BIBLIOGRAPHIC REFERENCES                                                                                                                                                                                                                                                                                       | TERRITORY OF ANALYSIS | OBJECTIVE                                                                                                                                                                                                                                                        | TYPE OF AGROECOSYSTEM                                                                             | METHODOLOGICAL APPROACHES           | TECHNIQUES AND TOOLS                                                                                                     | DIMENSIOES ADDRESSED                                                                                                                        | FARMERS' PERCEPTION                                                                                                                                                                                                                                                                                                         | RESILIENCE / ADAPTATION                                                                                                                                                                                                                                                                                                                |
|----------------------------------------------------------------------------------------------------------------------------------------------------------------------------------------------------------------------------------------------------------------------------------------------------------------|-----------------------|------------------------------------------------------------------------------------------------------------------------------------------------------------------------------------------------------------------------------------------------------------------|---------------------------------------------------------------------------------------------------|-------------------------------------|--------------------------------------------------------------------------------------------------------------------------|---------------------------------------------------------------------------------------------------------------------------------------------|-----------------------------------------------------------------------------------------------------------------------------------------------------------------------------------------------------------------------------------------------------------------------------------------------------------------------------|----------------------------------------------------------------------------------------------------------------------------------------------------------------------------------------------------------------------------------------------------------------------------------------------------------------------------------------|
| Title: Farmers intention to adopt sustainable agriculture hinges on climate awareness: The case of Vietnamese coffee. / Authors: Nga Nguyen & Evangelia G. Drakou. - Publicatio date: March, 26, 2021.                                                                                                         | Vietnam               | This study aims to understand the factors influencing farmers' decisions to adopt sustainable agricultural practices in the context of climate change in a low-income country. The Theory of Planned Behavior (TPB) was applied and adapted to fit               | Small coffee farms (conventional)                                                                 | Mixed; Qualitative and Quantitative | Interviews with farmers and key representatives, confirmatory factor statistical analysis                                | Socioeconomic, Agricultural Management, Climate Perception, Socio-Psychological                                                             | Increase in temperature, longer dry season, increased precipitation, and abnormal rainy seasons, which are supported by climate data from the NCHMF                                                                                                                                                                         | No information provided, only how likely certain farmers are to adopt sustainable practices in coffee farming                                                                                                                                                                                                                          |
| Title: Impact of drought associated with high temperatures on Coffea canephora plantations: a case study in Espírito Santo State, Brazil. / Authors: Luan PeroniVenanci, Roberto Filgueiras, Everardo Chartuni Mantovani, Cibele Hummel doAmaral, Fernando França da Cunha, Francisco Charles dos Santos Silva | Brazil                | The objective of this study was to conduct a technical-scientific analysis of the actual impact of drought associated with high temperatures and solar radiation on Coffea canephora (Pierre ex Froehner) plantations located in the northern, northwestern, and | Coffee-producing regions in Canilon in the north and northeast of Espírito Santo, Brazil (hybrid) | Quantitative                        | Data collection from secondary sources (meteorological data from official websites/INPE/IBGE) and descriptive statistics | Technical-scientific basis of the actual impact of drought associated with high temperatures and irradiation on conilon coffee plantations. | Not reported                                                                                                                                                                                                                                                                                                                | The adoption of agroforestry systems and the construction of small reservoirs can be useful to alleviate these climatic effects, reducing the risk of losses in coffee production and contributing to the sustainability of crops in the state of Espírito Santo.                                                                      |
| Title: Climate Change Adaptation, Food Security, and Attitudes toward Risk among Smallholder Coffee Farmers in Nicaragua. / Authors: Aniseh S. Bro . - Publication date: August, 26, 2020.                                                                                                                     | Nicaragua             | This study uses descriptive analyses and experimental risk games to assess coffee farmers' preferences and attitudes in the context of their adaptation to climate change.                                                                                       | Coffee agroecosystems in areas of climate vulnerability (hybrid)                                  | Qualitative                         | Data from indicators on social aspects, climate vulnerability, and food security, and interactive games                  | Social, Economic, Environmental, and Agricultural Management                                                                                | Perception of changes in temperature, precipitation, and yield                                                                                                                                                                                                                                                              | Their farming practices, which are responses likely to help them adapt to changes, are not always easy to adopt—not only because there is uncertainty about how successful they will be, but also because farmers must rely on knowledge and institutional support to implement these measures.                                        |
| Title: Impactos das mudanças climáticas e estratégias de adaptação em Região Trans-Himalaia do Nepal. / Authors: Dinesh Adhikari, Ritika Prasai, Sabina Lamichhane, Deepak Gautam, Sonia Sharma, Suman Acharya. - Publication date: December, 2021.                                                            | Nepal                 | To examine locally experienced climate change impacts and the adaptation practices adopted in the Muktinath Valley, Mustang District, Nepal. A mixed-methods approach was employed to collect both qualitative and quantitative data                             | Mountain farming/cropping (hybrid)                                                                | Mixed; Qualitative and Quantitative | Random sampling, interviews with key informants (N = 10), and focus group discussions (N = 2), and trend analysis        | Agricultural and climate perception, livelihood, physical health, and environmental health.                                                 | Agriculture, water resources, non-timber forest products, and human health have been extremely impacted due to climate change. In addition, various natural disasters, such as landslides, avalanches, the spread of invasive species, and an increase in the number of pests and flies, have been experienced and reported | The construction of an artificial pond, pest and weed control, changes in planting and harvesting times, and changes in cropping patterns were the main adaptation practices adopted by the local population. Likewise, the lack of technical and financial resources was the main constraint to the adoption of adaptation practices. |

| BIBLIOGRAPHIC REFERENCES                                                                                                                                                                                                                                             | TERRITORY OF ANALYSIS | OBJECTIVE                                                                                                                                                                                                                                  | TYPE OF AGROECOSYSTEM                                                                                                                                                                                                                                                                              | METHODOLOGICAL APPROACHES           | TECHNIQUES AND TOOLS                                                                                                                                                                                              | DIMENSIONS ADDRESSED                                                                                                                                                                                                                                                                           | FARMERS' PERCEPTION                                                                                                                                                                                                                                                                                                               | RESILIENCE / ADAPTATION                                                                                                                                                                                                                                                                                                                                                                                      |
|----------------------------------------------------------------------------------------------------------------------------------------------------------------------------------------------------------------------------------------------------------------------|-----------------------|--------------------------------------------------------------------------------------------------------------------------------------------------------------------------------------------------------------------------------------------|----------------------------------------------------------------------------------------------------------------------------------------------------------------------------------------------------------------------------------------------------------------------------------------------------|-------------------------------------|-------------------------------------------------------------------------------------------------------------------------------------------------------------------------------------------------------------------|------------------------------------------------------------------------------------------------------------------------------------------------------------------------------------------------------------------------------------------------------------------------------------------------|-----------------------------------------------------------------------------------------------------------------------------------------------------------------------------------------------------------------------------------------------------------------------------------------------------------------------------------|--------------------------------------------------------------------------------------------------------------------------------------------------------------------------------------------------------------------------------------------------------------------------------------------------------------------------------------------------------------------------------------------------------------|
| Title: Perceptions of climate change and its impacts: a comparison between farmers and institutions in the Amazonas Region of Peru. / Authors: Laura Altea. - Publication date: March, 31, 2019.                                                                     | Peru                  | This study aims to explore perceptions and interpretations of climate change and its impacts from two different perspectives: regional institutions and smallholder farmers. Its novelty lies in simultaneously examining different        | Rural properties in the Peruvian Amazon region, with coffee intercropped mainly with citrus fruits, bananas, and pitaya. Other cultivated products include sugarcane (only at higher altitudes) and subsistence crops such as maize, legumes, and various horticultural products (agroecological). | Qualitative                         | Participatory workshop. DRP, semi-structured interviews, participatory workshops (with institutions and farmers)                                                                                                  | Environmental, related to climate change and its impacts on coffee cultivation                                                                                                                                                                                                                 | Most of them described a considerable increase in temperatures compared to the past. An increase in the frequency and intensity of extreme events was reported, especially related to heavy rainfall causing landslides and, in some cases, flooding, crop failures, destruction of houses, and displacement of people. They also | Not reported                                                                                                                                                                                                                                                                                                                                                                                                 |
| Title: Framing vulnerability and coffee farmers' behaviour in the context of climate change adaptation in Nicaragua. / Authors: Sonia Quiroga, Cristina Suárez, Juan Diego Solís, Pablo Martínez-Juarez. - Publication date: November, 1, 2019.                      | Nicaragua             | Este artigo analisa as percepções dos agricultores e os indicadores de vulnerabilidade para descobrir quais indicadores estão ligados à capacidade percebida dos agricultores de se adaptarem às mudanças climáticas, praticando adaptação | Small coffee agroecosystems (hybrid)                                                                                                                                                                                                                                                               | Mixed; Qualitative and Quantitative | Primary data from questionnaires administered to farmers, secondary sources with vulnerability indicators, and stratified random sampling                                                                         | (i) Poverty in the region, (ii) access to education, and (iii) economic dependence                                                                                                                                                                                                             | Not reported. Only yes-or-no statements regarding possible changes and their impacts (perception of being able to adapt to climate change).                                                                                                                                                                                       | Reforestation, plantation renewal, soil conservation, crop diversification, water protection, transition to organic production, shade-grown coffee, and migration to higher altitudes (as a consequence of climate change, this increases farmers' perception of their adaptive capacity).                                                                                                                   |
| Title: Feedback modelling of the impacts of drought: A case study in coffee production systems in Viet Nam. / Authors: Yen Pham, Kathryn Reardon-Smith, Shahbaz Mushtaq, Ravinesh C. Deo. - Publication date: November, 2, 2020.                                     | Vietnam               | In this article, we apply causal loop modeling based on systems thinking theory to examine interdependencies and feedback processes among drought-related factors affecting agricultural production, using a case study of                 | Robusta coffee agroecosystems (conventional)                                                                                                                                                                                                                                                       | Qualitative                         | The data used in this study include primary data collected from semi-structured interviews and secondary data from the literature. The interviews were coded using the coding process of Kim and Andersen (2012). | Agricultural Production, Socioeconomic, Bioclimatic                                                                                                                                                                                                                                            | Water deficit, deforestation, and population growth in the region; a warmer climate has been observed, with water scarcity and more severe droughts during the dry season, affecting irrigation. An increase in erratic rainfall distribution and in the number and intensity of drought periods has negatively affected          | Irrigation, shading, and intercropping have been applied in several coffee plantations in the region to reduce risks associated with market fluctuations—especially when coffee prices fall—and changes in climatic conditions, including high temperatures and increased evapotranspiration. However, study participants highlighted barriers to the adoption of these practices, including limited capital |
| Title: Influence of livelihood assets, experienced shocks and perceived risks on smallholder coffee farming practices in Peru. / Authors: Rosalien E. Jezeer, Pita A. Verweija, René G.A. Bootb, Martin Junginger Maria J. Santos. - Publication date: May, 7, 2019. | Peru                  | The objective of this study is to understand what drives smallholder farmers' decision-making in adopting different shade and input management practices in coffee systems. Based on previous research, shade and input management are key | Family coffee agroecosystems with coffee varieties tolerant and non-tolerant to coffee leaf rust (hybrid)                                                                                                                                                                                          | Mixed; Qualitative and Quantitative | Semi-structured interview and analysis of variance                                                                                                                                                                | The impact of shocks, seasonality, and trends on farmers' livelihoods, referred to as the vulnerability context; risk perception such as volatile coffee prices, incidence of pests and diseases; coffee bean quality; recent extreme climatic events; precipitation and temperature patterns; | Farmers perceived pests and diseases, coffee price volatility, and increasing temperatures as the main risks to their livelihoods, with different levels of shade adoption.                                                                                                                                                       | One-third of the farmers reported increasing shade levels, with climate change as the main driver. Farmers who reduced shade were motivated to do so due to pests and diseases. Some farmers reported increasing input use, while others reported no changes in input levels. Pest and disease pressure was the main factor driving increased input use, for both organic and chemical inputs.               |

| BIBLIOGRAPHIC REFERENCES                                                                                                                                                                                                                                                                                               | TERRITORY OF ANALYSIS          | OBJECTIVE                                                                                                                                                                                                                              | TYPE OF AGROECOSYSTEM                                                                                                                                                                                                                               | METHODOLOGICAL APPROACHES           | TECHNIQUES AND TOOLS                                                                                       | DIMENSIOES ADDRESSED                                                                    | FARMERS' PERCEPTION                                                                                                                                                                                                                                                                                 | RESILIENCE / ADAPTATION                                                                                                                                                                                                                                                                                                                                         |
|------------------------------------------------------------------------------------------------------------------------------------------------------------------------------------------------------------------------------------------------------------------------------------------------------------------------|--------------------------------|----------------------------------------------------------------------------------------------------------------------------------------------------------------------------------------------------------------------------------------|-----------------------------------------------------------------------------------------------------------------------------------------------------------------------------------------------------------------------------------------------------|-------------------------------------|------------------------------------------------------------------------------------------------------------|-----------------------------------------------------------------------------------------|-----------------------------------------------------------------------------------------------------------------------------------------------------------------------------------------------------------------------------------------------------------------------------------------------------|-----------------------------------------------------------------------------------------------------------------------------------------------------------------------------------------------------------------------------------------------------------------------------------------------------------------------------------------------------------------|
| Title: Views from two mountains: exploring climate change impacts on traditional farming communities of Eastern Africa highlands through participatory scenarios. / Authors: Claudia Capitani, Weyessa Garede, Amsalu Mitiku, Gezahegn Berecha, Binyam Tesfau Hailu, Janne Heiskanen, Pekka Hurkkanen, Philip J. Platt | Kenya / Ethiopia               | In this study, we apply a participatory scenario modeling framework (Capitani et al., 2016) to assess potential social responses to climate change impacts up to the mid-21st century. We also model resulting land-use and land cover | Three altitudinal zones in the study area identified in relation to agroecological zones and the location of the main villages: low zone (below 1,200 m asl), mid zone (1,200–1,700 m asl), and mid-high zone (above 1,700 m asl) (agroecological). | Mixed; Qualitative and Quantitative | Meetings, workshop, landscape analysis workshop, modeling, and variance analysis                           | Social, Environmental, Agricultural, and Cultural                                       | In both regions: increase in precipitation and temperature, variability in the seasonal regime                                                                                                                                                                                                      | Strategies: integrated adaptation in agriculture and ecosystem services; food provision, water regulation, and climate regulation were identified as essential ecosystem services.                                                                                                                                                                              |
| Title: The Impact of Fair Trade on Smallholders' Capacity to Adapt to Climate Change. / Authors: Stefan Borsky e Martina Spata. - Publication date: September, 12, 2017.                                                                                                                                               | Latin America, Asia and Africa | The objective of this article is to evaluate the extent to which participation in Fair Trade can enhance farmers' adaptive capacity and make them more resilient to climate change.                                                    | Coffee agroecosystems (?)                                                                                                                                                                                                                           | Qualitative                         | Interviews                                                                                                 | Social, Environmental, Adaptive Capacity, and the Impact of Participation in Fair Trade | They indicate an increase in temperature, rainfall outside the rainy season, an increase in droughts and floods, and in some cases hail. Reduced harvests, uneven ripening, moldy and delayed harvests. Increased pests and diseases such as fungi and leaf spot, reducing the photosynthetic area. | Participation in fair trade, income, and perception, which influence the demand for adaptation. Improved access to credit and savings institutions; greater market access; training in adaptation and mitigation measures; increased access to internationally funded climate adaptation programs; crop switching to species resistant to diseases and drought. |
| Title: Perception of climate change and farm level adaptation choices in central Kenya. / Authors: Kinfe Asayehgn, Ludovic Temple, Berta Sanchez and Ana Iglesias. - Publication: April, 2017.                                                                                                                         | Kenya                          | This study aims to bridge large-scale research and ethnographic approaches by examining the relationship between perception and adaptation, in order to explore the reasons behind farmers' choices.                                   | Coffee agroecosystems (hybrid)                                                                                                                                                                                                                      | Mixed; Qualitative and Quantitative | Interviews, questionnaires, focus groups, group discussions, percentage, and variance.                     | Social, environmental, cultivation system and choices.                                  | Variation among farmers in perceiving or not perceiving climate-related changes.                                                                                                                                                                                                                    | Rotation of food crop systems (commercial), adjustment of planting dates, and change of varieties.                                                                                                                                                                                                                                                              |
| Title: Climate change and its impacts: perception and adaptation in rural areas of Manizales, Colombia. / Authors: Mariana G. Barrucand, Carolina Giraldo Vieira, Pablo O. Canziani. - Publication date: May, 14, 2016.                                                                                                | Colombia                       | This study aims to assess climate variability and change and compare them with local populations' perceptions and the adaptation strategies used to cope with challenges in rural areas of one of the Andean ranges in Colombia        | Different agroecosystems with three different locations and climates (agroecological)                                                                                                                                                               | Mixed; Qualitative and Quantitative | Questionnaires, statistical analysis (two-tailed Student's t-test), and analysis of secondary climate data | Social, climatic and cultural.                                                          | Temperature and precipitation changes, erosion and landslides, floods, and droughts were significant for the respondents. The use of cultural items, such as wool clothing, is becoming less common.                                                                                                | Reforestation and ground cover, alternative use of inputs to avoid insecticides that harm biodiversity, and requests for technical assistance in biodiversity management.                                                                                                                                                                                       |

| BIBLIOGRAPHIC REFERENCES                                                                                                                                                                                                                                                              | TERRITORY OF ANALYSIS    | OBJECTIVE                                                                                                                                                                                                                                           | TYPE OF AGROECOSYSTEM                                                 | METHODOLOGICAL APPROACHES           | TECHNIQUES AND TOOLS                                                                                                                                 | DIMENSIOES ADDRESSED                                                                                                                                                  | FARMERS' PERCEPTION                                                                                                                                                                                | RESILIENCE / ADAPTATION                                                                                                                                                                                                                                                                                                                                                                        |
|---------------------------------------------------------------------------------------------------------------------------------------------------------------------------------------------------------------------------------------------------------------------------------------|--------------------------|-----------------------------------------------------------------------------------------------------------------------------------------------------------------------------------------------------------------------------------------------------|-----------------------------------------------------------------------|-------------------------------------|------------------------------------------------------------------------------------------------------------------------------------------------------|-----------------------------------------------------------------------------------------------------------------------------------------------------------------------|----------------------------------------------------------------------------------------------------------------------------------------------------------------------------------------------------|------------------------------------------------------------------------------------------------------------------------------------------------------------------------------------------------------------------------------------------------------------------------------------------------------------------------------------------------------------------------------------------------|
| Title: Exploring coffee farmers' awareness about climate change and Water needs: Smallholders' perceptions of adaptive capacity. / Authors: Sonia Quiroga, Cristina Sua´ rez a , Juan Diego Solís. - Publication date: October, 21, 2014.                                             | Nicaragua                | The objective is to analyze the extent to which farmers depend on water resources and whether this dependence influences their risk perception and expectations regarding public and private support for adaptation.                                | Different coffee agroecosystems (?)                                   | Mixed; Qualitative and Quantitative | Questionnaires, focus group, descriptive statistics, and variance.                                                                                   | Environmental and climatic.                                                                                                                                           | Trust or lack of trust in policies and aid for climate change adaptation. "a. Being aware of water-related risks reduces the likelihood of perceiving high adaptive capacity in all scenarios."    | Not reported, only the strength of willingness to adopt an adaptation or not.                                                                                                                                                                                                                                                                                                                  |
| Title: Perceptions of risk and adaptation: Coffee producers, market shocks, and extreme weather in Central America and Mexico. / Authors: Catherine M. Tucker a, Hallie Eakin, Edwin J. Castellanos. - Publicação: July, 5, 2009.                                                     | Central America / Mexico | The objective is to explore the role of risk perception in adaptation to stress through comparative case studies of coffee farmers' responses to climatic and non-climatic stressors.                                                               | Socio-ecological coffee agroecosystems (smallholder farmers) (hybrid) | Qualitative                         | Semi-structured interviews and archival research                                                                                                     | Demography, agricultural production, crop prices, impacts and responses to the coffee crisis and climatic events, risk perception and local environmental conditions. | Extreme climate as a major concern, lack of rainfall, price fluctuations, diseases, and labor shortages.                                                                                           | Changes in land use, migration of agricultural activity, crop rotation and intercropping, reduction of chemical inputs.                                                                                                                                                                                                                                                                        |
| Title: Perception and adaptation to climate change of the K'Ho people related to coffee production in Lâm Đồng province, Vietnam. / Authors: Nguyen Dinh Nghiepa, le Minh chiena, Nguyen Van hoang b , pham hong haia, Dao thi hieua, Nguyen thi thanh thuana, Do Van toana, le Quang | Vietnam                  | This study focuses on the perceptions of the K'Ho people regarding climate change and their adaptation strategies in coffee farming. Specifically, it addresses two main questions: (1) What are the perceptions of the K'Ho ethnic minority in Lâm | Agroecosistemas cafeeiros de alta tecnologia (Híbrido)                | Mixed; Qualitative and Quantitative | Primary data from questionnaires and semi-structured interviews were used, and statistical analyses were conducted to describe farmers' perceptions. | Sociodemographic and environmental data regarding climate changes and perceptions.                                                                                    | Temperature, precipitation, soil moisture, wind strength, sunlight (ranging from little change to significant change, with most respondents perceiving substantial change).                        | Técnicas ancestrais e outras; variedade resistentes, podas de galhos, plantio de mudas em grandes sacos de viveiros, usar cobertura morta, plantar arvores de sombra (abacate, manga, caqui, macadamia), plantar arvores quebra vento (banana, jaca, flor de cerejeira, bambu, abacate, plantio de cobertura de solo (capim limão, cabaça, abobora), gestão de pragas e doenças desde o uso de |
| Title: Unraveling farmers' interrelated adaptation and mitigation adoption decisions under perceived climate change risks. / Authors: María Rodríguez-Barillas, Marijn Poortvliet, Laurens Klerkx. - Publication date: June, 25, 2024.                                                | Costa Rica               | To investigate the interrelated nature of the adoption of Climate-Smart Agriculture (CSA) technologies related to soil fertility, soil conservation, agroforestry, agro-advisory applications, and alternative coffee farming practices. To         | Coffee agroecosystems (?)                                             | Mixed; Qualitative and Quantitative | Focus groups and multiple probability analysis                                                                                                       | Education, sociodemography, CSA technologies and behavioral items, analyses of variances.                                                                             | CSA technologies: soil fertility, soil conservation, agroforestry, agricultural advisory services, alternative agriculture (crop diversification, organic fertilizers, organic farming practices). | Adoption or non-adoption of CSA technologies: soil fertility, soil conservation, agroforestry, agricultural advisory services, alternative agriculture (crop diversification, organic fertilizers, organic farming practices).                                                                                                                                                                 |

| BIBLIOGRAPHIC REFERENCES                                                                                                                                                                                                                                                        | TERRITORY OF ANALYSIS | OBJECTIVE                                                                                                                                                                                                                     | TYPE OF AGROECOSYSTEM                                                                                            | METHODOLOGICAL APPROACHES           | TECHNIQUES AND TOOLS                                                                                                                                                                                                                                                      | DIMENSIOES ADDRESSED                                                                                                                                                                                                                                       | FARMERS' PERCEPTION                                                                                                                                                                                                                                                                                                                          | RESILIENCE / ADAPTATION                                                                                                                                                                                                                                                                                                                                                                                                    |
|---------------------------------------------------------------------------------------------------------------------------------------------------------------------------------------------------------------------------------------------------------------------------------|-----------------------|-------------------------------------------------------------------------------------------------------------------------------------------------------------------------------------------------------------------------------|------------------------------------------------------------------------------------------------------------------|-------------------------------------|---------------------------------------------------------------------------------------------------------------------------------------------------------------------------------------------------------------------------------------------------------------------------|------------------------------------------------------------------------------------------------------------------------------------------------------------------------------------------------------------------------------------------------------------|----------------------------------------------------------------------------------------------------------------------------------------------------------------------------------------------------------------------------------------------------------------------------------------------------------------------------------------------|----------------------------------------------------------------------------------------------------------------------------------------------------------------------------------------------------------------------------------------------------------------------------------------------------------------------------------------------------------------------------------------------------------------------------|
| Title: PERCEPCIÓN DE PEQUEÑOS PRODUCTORES RESPECTO A LOS EFECTOS DEL CAMBIO CLIMÁTICO EN LA FLORACIÓN Y PLAGAS DE AGROECOSISTEMAS CAFETALEROS: UN ESTUDIO DE CASOT. / Authors: Marta Escarlet Beristain-Moreno, Alejandra Ramirez-Martinez, David Sólol-Davey et al.            | Mexico                | To assess smallholder coffee farmers' perceptions of the relationship between flowering, pests, and climate change in Sabanas, Veracruz.                                                                                      | Coffee agroecosystems (agroecological)                                                                           | Qualitative                         | Interviews using questionnaires with open-ended questions and observations in the agroecosystems                                                                                                                                                                          | General information about the producer and crop data, presence of pests in the cultivation, perception of and problems caused by climate change.                                                                                                           | Pests, drought, and delayed flowering caused by temperature changes; together, they affect the performance and quality of their product.                                                                                                                                                                                                     | Not reported                                                                                                                                                                                                                                                                                                                                                                                                               |
| Title: Are Vietnamese coffee farmers willing to pay for weather index insurance? / Authors: Le Lan, Shahbaz Mushtaq, Qingxia (Jenny) Wang, Angelica Barlis, Aline Deniau, Vivekananda Mittahalli Byrareddy, Huynh Tan Anh, Kees Swaans. - Publication date: December, 12, 2023. | Vietnam               | The main objective of this phase is to explore market demand and raise awareness of Weather Index Insurance (WII), introducing its concept and how it works through a pilot phase for the local community.                    | Coffee agroecosystems participating in a sustainable management program and coffee farmers not participating (?) | Mixed; Qualitative and Quantitative | Interview using a semi-structured questionnaire and statistical models (binary logit regression)                                                                                                                                                                          | Sociodemographic and agricultural characteristics of farmers, their perceptions and experiences with the impacts of climate change on their coffee production and their ability to manage the consequences of climate change, awareness of and exposure to | 92% of respondents indicated that extreme climatic events have impacted their agricultural activities in the past five years. The impacts of drought on yield and income loss were perceived as the highest among all extreme climatic events. Drought was experienced by the majority of surveyed farmers (91%), followed by                | Resilience or adaptation measures by farmers were not reported or investigated; however, adopting climate insurance emerges as a strategy mentioned in the study.                                                                                                                                                                                                                                                          |
| Title: Gendered adaptations to climate change in the Honduran coffee sector. / Authors: Hazel Velasco Palacios, Kathleen Sexsmith, Maithe Matheu, Andrea Reiche Gonzalez. - Publication date: April, 10, 2023.                                                                  | Honduras              | Analyze and compare climate adaptation measures adopted both on-farm and off-farm by women and men smallholder coffee farmers, and assess how gendered access to agricultural assets and gender roles within coffee-producing | Small coffee agroecosystems (hybrid)                                                                             | Qualitative                         | Interviews                                                                                                                                                                                                                                                                | Social, agricultural and environmental.                                                                                                                                                                                                                    | All participants (men and women) mentioned that they have noticed climate changes—mainly higher temperatures and longer dry seasons. They reported a decrease in production and grain quality; according to them, the prolonged dry season severely increased coffee flower loss and even caused damage to entire plantations, especially in | Agroforestry, new cultivars, variety replacement, crop diversification, and possible irrigation (both men and women adopt these measures, but men have greater ownership when reporting the benefits gained from implementing these strategies).                                                                                                                                                                           |
| Title: Impact of climate variability, farmers adaptation and coping strategies on coffee production in highlands of Kigoma District, Tanzania. / Authors ZIMBAYUMSUYA, CHRISTOPHERPAULMAHON GE. - Publication date: June, 22, 2022.                                             | Tanzania              | This study aimed to investigate how climate change and variability have contributed to the low coffee production that farmers have been facing in the highland areas of Kigoma District, Tanzania.                            | Coffee agroecosystems (hybrid)                                                                                   | Mixed; Qualitative and Quantitative | Semi-structured questionnaires, both closed- and open-ended, were used to collect information from families. In addition, individual interviews were conducted to gather information from farmers within the target families. Production, climate change, and variability | Social, cultural, environmental and system management.                                                                                                                                                                                                     | Perceptions differ among farmers, but all reported noticing some changes. Climate variability, decreasing precipitation, degradation of water sources, and deforestation were identified as the main factors driving climate change. The area has also been becoming warmer over the past 15 years, from September to                        | Only some have developed coping and adaptation measures to help them deal with the short- and long-term impacts of climate change and variability. Common practices included shifting to non-agricultural activities, engaging in temporary work, rainwater harvesting, mulching to reduce evaporation, receiving credit from coffee cooperative unions, planting hedges and shade trees to mitigate temperature increases |

| BIBLIOGRAPHIC REFERENCES                                                                                                                                                                                                                                                    | TERRITORY OF ANALYSIS | OBJECTIVE                                                                                                                                                                                                                                                      | TYPE OF AGROECOSYSTEM                                                  | METHODOLOGICAL APPROACHES           | TECHNIQUES AND TOOLS                                                                                       | DIMENSIO S ADDRESSED                                                                                                                                                                                    | FARMERS' PERCEPTION                                                                                                                                                                                                                                                                                                            | RESILIENCE / ADAPTATION                                                                                                                                                                                                                                                                                                                                                          |
|-----------------------------------------------------------------------------------------------------------------------------------------------------------------------------------------------------------------------------------------------------------------------------|-----------------------|----------------------------------------------------------------------------------------------------------------------------------------------------------------------------------------------------------------------------------------------------------------|------------------------------------------------------------------------|-------------------------------------|------------------------------------------------------------------------------------------------------------|---------------------------------------------------------------------------------------------------------------------------------------------------------------------------------------------------------|--------------------------------------------------------------------------------------------------------------------------------------------------------------------------------------------------------------------------------------------------------------------------------------------------------------------------------|----------------------------------------------------------------------------------------------------------------------------------------------------------------------------------------------------------------------------------------------------------------------------------------------------------------------------------------------------------------------------------|
| Title: Coping with drought: Lessons learned from robusta coffee growers in Vietnam. / Authors: Vivekananda Byrareddy, Louis Kouadio, Shahbaz Mushtaq Jarrod Kath, Roger Stone. - Publication date: May 3, 2021.                                                             | Vietnam               | The objectives of this study were to: (1) investigate coffee farmers' perceptions of and responses to drought; (2) assess the yield and financial impacts of drought and estimate the economic effect of drought mitigation strategies and (3)                 | Coffee agroecosystems (hybrid)                                         | Mixed; Qualitative and Quantitative | Structured questionnaires, demographics, archival materials, agricultural data, and econometric statistics | Questions about demography, cultivation system, perception of drought frequency and its impact on coffee plants, responses to drought events, and access to climate information and extension services. | Most respondents in Dak Lak (57%), Gia Lai (54%), and Lam Dong (64%) reported that drought occurs once every three years. In Dak Nong, 57% of respondents reported that its occurrence is biennial. Almost none of the participants experienced drought every year. Regarding the impact of drought on coffee                  | Irrigation, use of mulch                                                                                                                                                                                                                                                                                                                                                         |
| Title: Adaptation Measures to Climate Change in Coffee-Growing Organizations in the Central Region of Veracruz, Mexico                                                                                                                                                      | Mexico                | To understand coffee farmers' perceptions of climate change and to identify adaptation measures to disruptions that help address the adverse effects of climate change and reduce their current and future vulnerability.                                      | Agroecological and conventional coffee agroecosystems (agroecological) | Qualitative                         | Semi-structured questionnaire                                                                              | Sociodemography, climate change and adaptation measures.                                                                                                                                                | Rising temperatures, sudden thermal changes, changes in and delays of precipitation.                                                                                                                                                                                                                                           | Renovation of coffee plantations with pest- and disease-tolerant varieties; diversification of coffee plantations with polyculture (fruit trees, vegetables, staple grains, and others); modification of the agricultural calendar, mainly due to precipitation patterns; coffee shade management; soil and water conservation practices; and diversification of income sources. |
| Title: Impact of Climate Change on the Production of Coffea arabica at Mt. Kilimanjaro, Tanzania. / Authors: Sigrun Wagner, Laurence Jassogne, Elizabeth Price, Martin Jones e Richard Preziosi . - Publication date: January, 11, 2021.                                    | Tanzania              | The objectives of the study were: (1) to identify the extent of climate change and extreme weather events experienced by farmers on Mount Kilimanjaro over the past two decades; (2) to relate climate changes to ENSO and IOD extremes to determine potential | Commercial coffee agroecosystems with high diversity (hybrid)          | Mixed; Qualitative and Quantitative | Historical climate data, focus group, descriptive statistics                                               | Environmental and shade management.                                                                                                                                                                     | Climatic differences depending on the region: some reported excessive rainfall, while other farmers experienced periods of drought; however, perceptions align with climatic data. Increases in temperature, frequently reported as the factor leading to reduced yields, make areas unsuitable for coffee production, pushing | Not reported                                                                                                                                                                                                                                                                                                                                                                     |
| Title: Understanding the Perceptions of Sustainable Coffee Production: A Case Study of the K'Ho Ethnic Minority in a Small Village in Lâm Đồng Province, Vietnam / Authors: Quan Vu Le, Grace Jovanovic, Don-Thuan Le e Sanya Cowal. - Publication date: January, 31, 2020. | Vietnam               | The objective of this case study is to examine sustainable coffee farming as a means to mitigate the increasing impacts of climate change on coffee production.                                                                                                | Coffee agroecosystems of an ethnic community in Vietnam (conventional) | Mixed; Qualitative and Quantitative | Coffee sustainability indicators, questionnaire, and statistics (T-test and principal component analysis)  | Economic, social and environmental sustainability.                                                                                                                                                      | Lack of access to water, use of chemicals due to soil fertility and disease incidence, pesticide use, food insecurity and malnutrition, and high unemployment rates. During the rainy season, they are able to produce some food, but in the dry seasons this is not possible, exacerbating the community's food               | Not reported                                                                                                                                                                                                                                                                                                                                                                     |

| BIBLIOGRAPHIC REFERENCES                                                                                                                                                                                                                                                                            | TERRITORY OF ANALYSIS | OBJECTIVE                                                                                                                                                                                                                        | TYPE OF AGROECOSYSTEM                                                                                                                                                                                                                                                          | METHODOLOGICAL APPROACHES           | TECHNIQUES AND TOOLS                                                                                                                          | DIMENSIOES ADDRESSED                                                                                                                                                                                                                                                                | FARMERS' PERCEPTION                                                                                                                                                                                                                                                                                                                  | RESILIENCE / ADAPTATION                                                                                                                                                                                                                                                                                                                                                                                                     |
|-----------------------------------------------------------------------------------------------------------------------------------------------------------------------------------------------------------------------------------------------------------------------------------------------------|-----------------------|----------------------------------------------------------------------------------------------------------------------------------------------------------------------------------------------------------------------------------|--------------------------------------------------------------------------------------------------------------------------------------------------------------------------------------------------------------------------------------------------------------------------------|-------------------------------------|-----------------------------------------------------------------------------------------------------------------------------------------------|-------------------------------------------------------------------------------------------------------------------------------------------------------------------------------------------------------------------------------------------------------------------------------------|--------------------------------------------------------------------------------------------------------------------------------------------------------------------------------------------------------------------------------------------------------------------------------------------------------------------------------------|-----------------------------------------------------------------------------------------------------------------------------------------------------------------------------------------------------------------------------------------------------------------------------------------------------------------------------------------------------------------------------------------------------------------------------|
| Title: Smallholder Farmer Adoption of Climate-Related Adaptation Strategies: The Importance of Vulnerability Context, Livelihood Assets, and Climate Perceptions; / Authors: Shinbrot, KW Jones A. Rivera-Castañeda, W. López-Báez, DS Ojima. - Publication date: March, 5, 2019.                   | Mexico                | The specific objectives of this study were: (1) to document the prevalence of adaptation strategies among smallholder ejido farmers; (2) to explore which vulnerabilities and livelihood assets were determining factors for the | Private and collective agroecosystems (agroecological)                                                                                                                                                                                                                         | Mixed; Qualitative and Quantitative | Interviews using semi-structured questionnaires, variable analyses, and accuracy tests                                                        | Demography; land leasing, quality and harvests; government income; resilience and climate change adaptation strategies; community and group participation; and wealth. To measure adaptive strategies, the following were examined: migration, storage, land use                    | Farmers strongly perceived the impacts of climate change: on a Likert scale from 1 to 5, households had an average score of 4. More than 80% of respondents experienced a disaster in the past 10 years; of these, 59% reported having suffered a hurricane, 10% reported earthquakes and landslides (each 7% reported               | In terms of individual adaptation strategies, farmers reported more frequent shade-grown coffee cultivation (82%), planting different crop varieties (75%), and changing sowing dates (70%) (Fig. 3). Other commonly implemented practices included building living fences (69%), reforestation (63%), and using soil conservation strategies such as cover crops (63%). Strategies such as constructing filtration dams to |
| Title: Use and perceptions of alternative economic activities among smallholder coffee farmers in Huehuetenango and El Quiché departments in Guatemala. / Authors: Andrew Gerlicz, V. Ernesto Méndez, David Conner, Daniel Baker & Dana Christel. - Publication date: October, 19, 2018.            | Guatemala             | In the following article, we attempt to elucidate coffee farmers' perceptions of specific diversification activities and how and why they perceive the benefits of these activities in relation to coffee production.            | Coffee agroecosystems of family cooperatives (hybrid)                                                                                                                                                                                                                          | Qualitative                         | Interviews conducted through a workshop                                                                                                       | Historical information on specific economic activities; details about the practices involved; yields and prices; contributions to livelihoods; comparisons with coffee; reasons for not specializing in coffee; reasons for not pursuing other economic alternatives; and place and | Coffee leaf rust disease had a devastating impact on coffee production for the majority of our respondents. In some cases, the disease was so severe that the trees could not recover, requiring farmers to replant entire orchards. However, most were optimistic about production, believing it to be a temporary problem          | Temporary coping strategies included reducing reliance on non-family labor, seeking temporary off-farm employment, expanding milpa production, and using savings or loans to cover livelihood expenses. Production diversification was also implemented.                                                                                                                                                                    |
| Title: Percepciones de cambio climático y respuestas adaptativas de pequeños agricultores en dos paisajes guatemaltecos. / Authors: Bárbara Viguera, Francisco Alpizar, Celia A. Harvey, M. Ruth Martínez-Rodríguez, Milagro Saborío-Rodríguez, Lucía Contreras. - Publication date: July, 18, 2019 | Guatemala             | The objective of this study was to characterize two small-scale farming systems in Guatemala, document how smallholder farmers perceive the impacts of climate change, and identify the adaptation efforts undertaken            | Agroecosistemas representativos de pequeños agricultores (Híbridos)                                                                                                                                                                                                            | Qualitative                         | Secondary analysis from documents and geographic data, on-site visits, interviews with the property manager, and focus groups for validation. | Socioeconomic characteristics of household heads, households, and aspects of the production system, in addition to georeferenced and documentary data. Respondents were asked about their use of certain management practices (considered ecosystem-based                           | 90% of respondents in Acatenango perceived changes in temperature and 86% in precipitation, while in Chiquimula 88% reported changes in temperature and 96% in precipitation. Among those who perceived climate changes, the perception of increased temperature was widespread, whereas the perception of                           | Although the vast majority of smallholders perceived changes in the climate of their region over the past ten years and reported impacts on their crops as a result, only a portion of producers implemented measures to adapt their production systems. In Acatenango, 51% of the surveyed producers made changes in farm management, attempting to adapt their crops to new climatic conditions, whereas in Chiquimula    |
| Title: Climate change perceptions and adaptive responses of small-scale coffee farmers in Costa Rica. / Authors: Bárbara Viguera, Francisco Alpizar, Celia A. Harvey, M. Ruth Martínez-Rodríguez, Milagro Saborío-Rodríguez. - Publication date: May, 4, 2019.                                      | Costa Rica            | The objective of this study was to describe small-scale coffee systems in Costa Rica across two production areas and to present the efforts made by farmers to adapt to climate change.                                          | Coffee agroecosystems with the following characteristics: study landscapes in Costa Rica with (i) predominance of small-scale agriculture, (ii) presence of coffee as the main crop, (iii) high vulnerability to climate change, and (iv) low adaptive capacity (conventional) | Qualitative                         | Structured research (questionnaires)                                                                                                          | Socioeconomic characteristics and aspects of the production system, such as the presence of livestock, staple crops, and home gardens. To characterize coffee management, questions were asked about the use of a wide range of practices: weeding, use of agrochemicals            | Ninety-eight percent of all surveyed producers reported having perceived a change in the local climate over the past ten years (between 2004 and 2014). In Turrialba, 96% observed changes related to temperature and 94% to precipitation, while in Los Santos, 96% and 93%, respectively, reported such changes. The perception of | The most frequent management changes in both landscapes in response to perceived changes were the incorporation of trees on the farm (50%), increased use of pesticides, herbicides, fungicides (24%) and fertilizers (15%), and the introduction of soil management and conservation practices (15%). The implementation of technological practices (such as the introduction of improved varieties, irrigation            |

| BIBLIOGRAPHIC REFERENCES                                                                                                                                                                                                                                                                             | TERRITORY OF ANALYSIS | OBJECTIVE                                                                                                                                                                                                                                                    | TYPE OF AGROECOSYSTEM                                                                                                | METHODOLOGICAL APPROACHES           | TECHNIQUES AND TOOLS                                                                                                                                                                         | DIMENSIOES ADDRESSSED                                                                                                                                                                                                                                                   | FARMERS' PERCEPTION                                                                                                                                                                                                                                                                                                                      | RESILIENCE / ADAPTATION                                                                                                                                                                                                                                                                                                                                                                                                |
|------------------------------------------------------------------------------------------------------------------------------------------------------------------------------------------------------------------------------------------------------------------------------------------------------|-----------------------|--------------------------------------------------------------------------------------------------------------------------------------------------------------------------------------------------------------------------------------------------------------|----------------------------------------------------------------------------------------------------------------------|-------------------------------------|----------------------------------------------------------------------------------------------------------------------------------------------------------------------------------------------|-------------------------------------------------------------------------------------------------------------------------------------------------------------------------------------------------------------------------------------------------------------------------|------------------------------------------------------------------------------------------------------------------------------------------------------------------------------------------------------------------------------------------------------------------------------------------------------------------------------------------|------------------------------------------------------------------------------------------------------------------------------------------------------------------------------------------------------------------------------------------------------------------------------------------------------------------------------------------------------------------------------------------------------------------------|
| Title: Climate change impacts and adaptation among smallholder farmers in Central America. / Authors: Celia A. Harvey, Milagro SaborioRodriguez, M. Ruth MartinezyRodriguez, Barbara Viguera, Adina ChainyGuadarrama, Rafaele Vignola, e Francisco Alpizar. - Publication date: August, 14, 2018.    | Central America       | To examine whether farmers perceive climate changes, how they are being affected by climate change, if and how they are modifying their farming systems to cope with or adapt to the impacts of climate change, and what adaptation support                  | Small coffee agroecosystems (hybrid)                                                                                 | Mixed; Qualitative and Quantitative | Interviews, household visits, descriptive statistics, variance analysis, and mean calculations                                                                                               | Impacts, responses, and adaptation needs to climate change. Socioeconomic characteristics of farmers and their families, land use, farm management practices, farmers' perceptions of climate change, the impacts of climate change, and farmers' adaptation strategies | Ninety-five percent of all surveyed farmers reported having perceived changes in the local climate over the past decade. Among those who perceived that the climate was changing, 96.3% reported changes in temperature and 94.6% in precipitation. The most commonly reported change among farmers who perceived changes in             | Fifty-eight point seven percent of coffee producers made changes in response to climate change, compared to only 35.5% of staple crop producers. On average, farmers who changed their management practices in response to climate change implemented an average of 1.5 (±0.12) adaptation practices. Smallholders implemented a variety of adaptation practices, including agroforestry and                           |
| Title: Climate variability and mitigation: perceptions and strategies adopted by traditional coffee growers in India. / Authors: P.G. Chengappa, C.M. Devika & C.S. Rudragouda. - Publication date: May, 2017.                                                                                       | India                 | The specific objectives of the study are: (a) to understand coffee farmers' perceptions of climate variability affecting their production, and (b) to understand the causality between these perceptions and the actions undertaken by                       | Coffee agroecosystems in a production region of India, Kodagu (conventional)                                         | Mixed; Qualitative and Quantitative | Descriptive statistics were used to provide Likert scale responses, questionnaire data, and meteorological data.                                                                             | Socioeconomic characteristics of coffee farmers, their perceptions of climate variability, the associated risks, and the corroboration of these perceptions with factual production and meteorological data.                                                            | Arabica producers perceived a decrease in productivity, while 60% of Robusta producers perceived an increase in yields over the past 10 years. Seventy percent of coffee producers in Kodagu rated climate variability as a high-risk factor in production, followed by the unavailability of skilled labor (55%). Pest and              | Soil and water conservation will mitigate variations in precipitation and temperature to a large extent. However, interestingly, 66.07% of producers did not see an urgent need to change their cultivation practices, even though they perceived climate variability as an imminent threat to long-term coffee production. (Suggested strategies: switching from Arabica to Robusta / water management / coffee shade |
| Title: Adaptation in a multi-stressor environment: perceptions and responses to climatic and economic risks by coffee growers in Mesoamerica. / Authors: Hallie Eakin; Catherine M. Tucker; Edwin Castellanos; Rafael DiazPorras; Juan F. Barrera; Helda Morales. - Publication date: July, 5, 2013. | Mesoamerica           | To assess farmers' perceptions of climate risk and variability in relation to other stressors, and to gain insights into the autonomous adaptation-by-proxy process: through an evaluation of how farmers explain their choices regarding distinct stressors | Smallholder coffee agroecosystems (hybrid)                                                                           | Mixed; Qualitative and Quantitative | Case studies, questionnaires, household visits, and descriptive statistics                                                                                                                   | Sociodemograficas e ambiental                                                                                                                                                                                                                                           | Forty to sixty-six percent of surveyed households reported being affected by drought conditions over the past 10 years, and 53% of households cited impacts from heavy rainfall (with particularly high frequencies in the two sites in Costa Rica, Concepción del Sur in Honduras, and Cacahoatán in Mexico). These two climate-related | By far, the most common responses among households that reported drought impacts were "do nothing" or "there is nothing we can do." A small percentage (21%), however, reported investing in improved shade management as a protective measure against drought. Soil conservation was by far the most frequently reported change in strategy. In Nicoya, almost all farmers reported having reduced                    |
| Title: Socioeconomic and Environmental Basis for the Development of Small Scale Forestry in a Highly Degraded Watershed in the Venezuelan Andes. / Authors: Armando Torres-Lezama; Emilio Vilanova; Hirma Ramí' rez-Angulo; Giancarlo Alcíaturi. - Publication date: November, 11, 2011.             | Venezuela             | The objective is to examine the conditions and sources that allow for a general characterization of the study site and the municipality of Antonio Pinto Salinas.                                                                                            | Agricultural systems focused on coffee in the Chama River Basin and the Lake Maracaibo influence zone (conventional) | Mixed; Qualitative and Quantitative | Analyses of primary and secondary data, field observation, and literature review. Soil loss (erosion) was also considered an indicator to estimate the current status of the surveyed farms. | . Elementos gerais de distribuição populacional, emprego e pobreza foram obtidos, enquanto fatores ecológicos potencialmente tendo um impacto direto na estabilidade da terra e produtividade também foram examinados.                                                  | Severe soil loss was detected in 45% (not reported), and nearly 38% of the surveyed farms contained, among a diverse range of vegetation types, small remnants of cloud forest. A small proportion of landowners (27%) indicated the occasional use of small-scale logging for timber products. Around 40% of local                      | Around 37% of local residents were able to provide some ideas about potential practices related to more sustainable management of coffee production and the watershed as a whole. Reforestation was the most commonly proposed recommendation; the inclusion of tree cover in coffee-growing areas (using a variety of methods) was considered a solid alternative to reduce natural degradation                       |

| BIBLIOGRAPHIC REFERENCES                                                                                                                                                                              | TERRITORY OF ANALYSIS | OBJECTIVE                                                                                                                                                         | TYPE OF AGROECOSYSTEM                                                     | METHODOLOGICAL APPROACHES | TECHNIQUES AND TOOLS       | DIMENSIOES ADDRESSED       | FARMERS' PERCEPTION                                                                                                                                                                                                                                                                                                     | RESILIENCE / ADAPTATION                                                                                                                                                                                                                                                                                                                                                                                                 |
|-------------------------------------------------------------------------------------------------------------------------------------------------------------------------------------------------------|-----------------------|-------------------------------------------------------------------------------------------------------------------------------------------------------------------|---------------------------------------------------------------------------|---------------------------|----------------------------|----------------------------|-------------------------------------------------------------------------------------------------------------------------------------------------------------------------------------------------------------------------------------------------------------------------------------------------------------------------|-------------------------------------------------------------------------------------------------------------------------------------------------------------------------------------------------------------------------------------------------------------------------------------------------------------------------------------------------------------------------------------------------------------------------|
| Title: Percepciones y formas de adaptación a riesgos sociambientales en el páramo de Sonsón, Colombia. / Authors: Juan Camilo de los Ríos C. Jalcione Almeida. - Publication date: December, 30 2010. | Colombia              | The objective is to examine the conditions and sources that allow for a general characterization of the study site and the municipality of Antonio Pinto Salinas. | Coffee farmers, extractivists, and diversified producers (agroecological) | Qualitative               | Semi-structured interviews | Social, ambiental e gestão | Forced displacement more severely affected rural communities in the municipalities of Argelia and Nariño, in the Magdalena River basin, where all interviewed farmers reported having had some type of related experience; some even stated that they had left the region for several years and later returned to their | Other forms of local adaptation to risks related to lack of financial resources include strategic alliances between farmers and agricultural input suppliers. According to farmers, in these partnerships, suppliers provide inputs to the farmer, who later pays for them with the profit from the sale of products. Other alliances identified by farmers, especially in diversified agricultural systems, occur when |
